# Supplementary material
Source: ML conference proceedings conference paper supplement (https://openreview.net/forum?id=wYgRIJ-oK6M)
Supplement: supplementary_material [file attachment]

---

# BiT: Robustly Binarized Multi-distilled Transformer

---

Anonymous Author(s)  
Affiliation  
Address  
email

## 1 A Appendix

### 2 A.1 BiT vs. progressive distillation

Table 1: BiT vs. progressive distillation on selected GLUE tasks. Methods differ in the teacher model used and the model from which the student weights are initialized.

| Method              | Teacher      | Initialization | MNLI <sub>m/mm</sub> | QQP         | QNLI        | SST-2       | CoLA        | STS-B       | MRPC        | RTE         | Avg.        |
|---------------------|--------------|----------------|----------------------|-------------|-------------|-------------|-------------|-------------|-------------|-------------|-------------|
| BiBERT Distillation | 32-32-32     | 32-32-32       | 77.0/77.2            | 83.1        | 84.1        | 89.7        | 31.3        | 60.1        | 75.5        | 56.7        | 69.7        |
| Progressive         | 32-32-32     | 1-1-2          | 78.9/78.9            | 85.0        | 86.4        | 89.6        | 30.5        | <b>75.1</b> | <b>81.1</b> | 60.6        | 73.4        |
| BiT                 | <b>1-1-2</b> | <b>1-1-2</b>   | <b>79.5/79.4</b>     | <b>85.4</b> | <b>86.4</b> | <b>89.9</b> | <b>32.9</b> | 72.0        | 79.9        | <b>62.1</b> | <b>73.5</b> |

3 Previous work has also recognized the importance of good initialization for binary model training,  
4 and proposed to perform distillation while progressively quantizing the student model (Zhuang et al.,  
5 2018; Yang et al., 2019). Progressive distillation ensures a good initialization for the student model at  
6 each step. However, in this approach the teacher model is fixed to the full precision model, which  
7 does not address the problem of teacher-student gap. In Table 1 we compare BiT to a comparable  
8 implementation of progressive distillation, using the same quantization schedule, W32A32 → W1A2  
9 → W1A1, as ours. We keep the teacher model fixed, while re-initializing the student model from  
10 the latest quantized version at each step. We see that using a quantized teacher model is helpful,  
11 especially in the high-data regime. However, our method can lag behind progressive distillation for  
12 small datasets such as STS-B and MRPC.

### 13 A.2 Elastic binarization function vs. ReActNet learnable bias

Table 2: Elastic binarization function vs. ReActNet (Liu et al., 2020) learnable bias on GLUE tasks.

| Method                                     | MNLI <sub>m/mm</sub> | QQP  | QNLI | SST-2 | CoLA | STS-B | MRPC | RTE  | Avg. |
|--------------------------------------------|----------------------|------|------|-------|------|-------|------|------|------|
| Our two-set binarization (Strong Baseline) | 57.4/59.1            | 68.3 | 64.7 | 81.0  | 18.2 | 24.7  | 71.8 | 56.7 | 55.3 |
| + learnable scale                          | 76.5/76.8            | 82.7 | 85.1 | 88.1  | 26.6 | 62.3  | 74.3 | 58.1 | 69.2 |
| + learnable scale and bias (BiT †)         | 77.1/77.5            | 82.9 | 85.7 | 87.7  | 25.1 | 71.1  | 79.7 | 58.8 | 71.0 |

14 Inspired by the learnable bias proposed in ReActNet (Liu et al., 2020), we further propose elastic  
15 binarization function to learn both learnable scaling factors and learnable bias. We find this learnable  
16 scaling factor critical for the final performance. As shown in table 2, the proposed learnable scaling  
17 factor brings 13.9% accuracy improvement, and further adding learnable bias boosts the accuracy by  
18 1.8%.

### 19 A.3 Two-set binarization scheme vs. Bi-Attention

20 In contrast to Bi-Attention proposed in BiBERT (Qin et al., 2021) that removes SoftMax and binarizes  
21 the attention to {0, 1} with bool function, our two-set binarization scheme finds that keeping SoftMax  
22 in attention computation and also binarizing the positive output of ReLU layer to {0, 1} works better.  
23 We conduct meticulous experiments to compare these choices. In Table 3, we show that, compared to  
24 removing SoftMax as Bi-Attention suggested, simply binarizing the activations after SoftMax layer

Table 3: Two-set binarization scheme vs. Bi-Attention (Qin et al., 2021) on GLUE tasks. Methods differ in whether using SoftMax in attention and whether binarizing the ReLU output to  $\{0, 1\}$ .

| Method                                        | Attention  | ReLU output | MNLI <sub>-v/mm</sub> | QQP  | QNLI | SST-2 | CoLA | STS-B | MRPC | RTE  | Avg. |
|-----------------------------------------------|------------|-------------|-----------------------|------|------|-------|------|-------|------|------|------|
| Bi-Attention (w/o Softmax)                    | $\{0, 1\}$ | $\{-1, 1\}$ | 48.1/50.0             | 60.1 | 60.6 | 78.8  | 14.0 | 22.3  | 68.4 | 58.1 | 51.3 |
| Binarize attention to $\{0, 1\}$ (w/ Softmax) | $\{0, 1\}$ | $\{-1, 1\}$ | 51.9/52.6             | 76.2 | 60.5 | 79.6  | 11.6 | 18.1  | 70.6 | 55.6 | 53.0 |
| Two-set binarization scheme                   | $\{0, 1\}$ | $\{0, 1\}$  | 57.4/59.1             | 68.3 | 64.7 | 81.0  | 18.2 | 24.7  | 71.8 | 56.7 | 55.3 |

25 to  $\{0, 1\}$  even produces 1.7% better accuracy. Furthermore, binarizing the ReLU layer output to  $\{0,$   
 26  $1\}$  instead of  $\{-1, 1\}$  helps the binary network match real-valued distributions and further brings 2.3%  
 27 accuracy improvement.

#### 28 A.4 Binary convolution implementation for two-set binarization scheme

29 The binary convolution between the weights and activations that are both binarized to  $\{-1, 1\}$  (i.e.  
 30  $\mathbf{A}_B \in \{-1, 1\}$ ,  $\mathbf{W}_B \in \{-1, 1\}$ ) can be implemented by the bitwise `xnor` operation followed by a  
 31 `popcnt` operation (Rastegari et al., 2016; Liu et al., 2018):

$$\mathbf{A}_B \cdot \mathbf{W}_B = \text{popcnt}(\text{xnor}(\mathbf{A}_B, \mathbf{W}_B)) \quad (1)$$

32 For the case where activations are binarized to  $\{0, 1\}$  in two-set binarization scheme, the binary  
 33 activation  $\mathbf{A}_B \in \{0, 1\}$  can be represented with  $\mathbf{A}'_B \in \{-1, 1\}$  through a simple linear mapping:  
 34  $\mathbf{A}_B = \frac{\mathbf{A}'_B + 1}{2}$ . Thus the matrix computation between binary weights ( $\mathbf{W}_B \in \{-1, 1\}$ ) and binary  
 35 activations ( $\mathbf{A}_B \in \{0, 1\}$ ) can be converted to the operations between  $\mathbf{W}_B \in \{-1, 1\}$  and  $\mathbf{A}'_B \in \{-1,$   
 36  $1\}$  as:

$$\mathbf{A}_B \cdot \mathbf{W}_B = \left(\frac{\mathbf{A}'_B + 1}{2}\right) \cdot \mathbf{W}_B = \frac{1}{2}(\text{popcnt}(\text{xnor}(\mathbf{A}'_B, \mathbf{W}_B)) + \sum_i \mathbf{W}_{B_i}) \quad (2)$$

37 Here the  $\sum_i \mathbf{W}_{B_i}$  is summing up the values in  $\mathbf{W}_B$ , which can be pre-computed and stored as  
 38 bias. Thus in the two-set binarization scheme where activations are binarized to  $\{0, 1\}$ , the binary  
 39 convolution can still be implemented with the general binary convolution in E.q. 1 at no additional  
 40 complexity cost.

#### 41 A.5 Evaluation benchmarks

##### 42 A.5.1 GLUE

43 The GLUE benchmark (Wang et al., 2019) includes the following datasets:

44 **MNLI** Multi-Genre Natural Language Inference is an entailment classification task (Williams et al.,  
 45 2018). The goal is to predict whether a given sentence *entails*, *contradicts*, or is *neutral* with respect  
 46 to another.

47 **QQP** Quora Question Pairs is a paraphrase detection task. The goal is to classify whether two given  
 48 questions have the same meaning. The questions were sourced from the Quora question answering  
 49 website (Chen et al., 2018).

50 **QNLI** Question Natural Language Inference (Wang et al., 2019) is a binary classification task  
 51 which is derived from the Stanford Question Answering Dataset (Rajpurkar et al., 2016). The task is  
 52 to predict whether a sentence contains the answer to a given question.

53 **SST-2** The Stanford Sentiment Treebank is a binary sentiment classification task, with content  
 54 taken from movie reviews (Socher et al., 2013).

55 **CoLA** The Corpus of Linguistic Acceptability is a corpus of English sentences, each with a binary  
 56 label denoting whether the sentence is linguistically acceptable (Warstadt et al., 2019).

57 **STS-B** The Semantic Textual Similarity Benchmark is a sentence pair classification task. The goal  
 58 is to predict how similar the two sentences are in meaning, with scores ranging from 1 to 5 (Cer et al.,  
 59 2017).

60 **MRPC** Microsoft Research Paraphrase Corpus is another sentence pair paraphrase detection task  
61 similar to QQP. The sentence pairs are sourced from online news sources (Dolan & Brockett, 2005).

62 **RTE** Recognizing Textual Entailment is a small natural language inference dataset similar to MNLI  
63 in content (Bentivogli et al., 2009).

#### 64 **A.5.2 SQuAD**

65 The SQuAD benchmark (Rajpurkar et al., 2016), *i.e.*, Stanford Question Answering Dataset, is a  
66 reading comprehension dataset, consisting of questions on a set of Wikipedia articles, where the  
67 answer to each question is a segment of text from the corresponding passage, or the question might  
68 be unanswerable.

#### 69 **A.6 Technical details**

70 For each experiment, we sweep the learning rate in  $\{1e-4, 2e-4, 5e-4\}$  and the batch size in  $\{8, 16\}$   
71 for QNLI, SST-2, CoLA, STS-B, MRPC, RTE, and  $\{16, 32\}$  for MNLI, QQP as well as SQuAD,  
72 and choose the settings with the highest accuracy on the validation set. We use the same number of  
73 training epochs as BiBERT (Qin et al., 2021), *i.e.*, 50 for CoLA, 20 for MRPC, STS-B and RTE, 10  
74 for SST-2 and QNLI, 5 for MNLI and QQP. We adopt the Adam optimizer with weight decay 0.01  
75 and use 0.1 warmup ratio with linear learning rate decay.

76 Our full precision checkpoints are taken from [https://textattack.readthedocs.io/en/  
77 latest/3recipes/models.html#bert-base-uncased](https://textattack.readthedocs.io/en/latest/3recipes/models.html#bert-base-uncased).

#### 78 **References**

79 Luisa Bentivogli, Peter Clark, Ido Dagan, and Danilo Giampiccolo. The fifth pascal recognizing  
80 textual entailment challenge. In *TAC*, 2009.

81 Daniel Cer, Mona Diab, Eneko Agirre, Inigo Lopez-Gazpio, and Lucia Specia. Semeval-2017 task  
82 1: Semantic textual similarity-multilingual and cross-lingual focused evaluation. *arXiv preprint  
83 arXiv:1708.00055*, 2017.

84 Zihan Chen, Hongbo Zhang, Xiaoji Zhang, and Leqi Zhao. Quora question pairs. *University of  
85 Waterloo*, pp. 1–7, 2018.

86 Bill Dolan and Chris Brockett. Automatically constructing a corpus of sentential paraphrases. In  
87 *Third International Workshop on Paraphrasing (IWP2005)*, 2005.

88 Zechun Liu, Baoyuan Wu, Wenhan Luo, Xin Yang, Wei Liu, and Kwang-Ting Cheng. Bi-real net:  
89 Enhancing the performance of 1-bit cnns with improved representational capability and advanced  
90 training algorithm. In *Proceedings of the European conference on computer vision (ECCV)*, pp.  
91 722–737, 2018.

92 Zechun Liu, Zhiqiang Shen, Marios Savvides, and Kwang-Ting Cheng. Reactnet: Towards precise  
93 binary neural network with generalized activation functions. In *European Conference on Computer  
94 Vision*, pp. 143–159. Springer, 2020.

95 Haotong Qin, Yifu Ding, Mingyuan Zhang, YAN Qinghua, Aishan Liu, Qingqing Dang, Ziwei Liu,  
96 and Xianglong Liu. Bibert: Accurate fully binarized bert. In *International Conference on Learning  
97 Representations*, 2021.

98 Pranav Rajpurkar, Jian Zhang, Konstantin Lopyrev, and Percy Liang. Squad: 100, 000+ questions for  
99 machine comprehension of text. In *EMNLP*, 2016.

100 Mohammad Rastegari, Vicente Ordonez, Joseph Redmon, and Ali Farhadi. Xnor-net: Imagenet  
101 classification using binary convolutional neural networks. In *European conference on computer  
102 vision*, pp. 525–542. Springer, 2016.

- 103 Richard Socher, Alex Perelygin, Jean Wu, Jason Chuang, Christopher D Manning, Andrew Y Ng, and  
104 Christopher Potts. Recursive deep models for semantic compositionality over a sentiment treebank.  
105 In *Proceedings of the 2013 conference on empirical methods in natural language processing*, pp.  
106 1631–1642, 2013.
- 107 Alex Wang, Amanpreet Singh, Julian Michael, Felix Hill, Omer Levy, and Samuel R Bowman. Glue:  
108 A multi-task benchmark and analysis platform for natural language understanding. In *International  
109 Conference on Learning Representations*, 2019.
- 110 Alex Warstadt, Amanpreet Singh, and Samuel R Bowman. Cola: The corpus of linguistic acceptability  
111 (with added annotations). 2019.
- 112 Adina Williams, Nikita Nangia, and Samuel R Bowman. The multi-genre nli corpus. 2018.
- 113 Yifan Yang, Qijing Huang, Bichen Wu, Tianjun Zhang, Liang Ma, Giulio Gambardella, Michaela  
114 Blott, Luciano Lavagno, Kees Vissers, John Wawrzyniek, et al. Synetgy: Algorithm-hardware  
115 co-design for convnet accelerators on embedded fpgas. In *Proceedings of the 2019 ACM/SIGDA  
116 international symposium on field-programmable gate arrays*, pp. 23–32, 2019.
- 117 Bohan Zhuang, Chunhua Shen, Mingkui Tan, Lingqiao Liu, and Ian Reid. Towards effective low-  
118 bitwidth convolutional neural networks. In *Proceedings of the IEEE conference on computer vision  
119 and pattern recognition*, pp. 7920–7928, 2018.
